# Supplementary material
Source: publisher figshare collection journal article supplement (https://karger.figshare.com/ndownloader/files/22538861)
Supplement: Supplementary file 1 [file 22538861]

ANHANG

**Bewertungsbogen – Fallbericht**

Name: ___________________ Semester: ___ Dozentin: _______________________

| **Punkt** | **Erfüllt** | **Plus** | **Kommentar** |
| --- | --- | --- | --- |
| Spontan berichtete Symptomatik |  |  |  |
| Lebensge./Krankheitsanamnese |  |  |  |
| Psychischer Befund |  |  |  |
| Somatischer Befund |  |  |  |
| Verhaltens-/Funktionsanalyse |  |  |  |
| Diagnosen |  |  |  |
| Therapieziele & Prognose |  |  |  |
| Behandlungsplan |  |  |  |
| Behandlungsverlauf (2-4 Interv. & Bezug auf Ziele) |  |  |  |
| **Zusätze** | | | |
| Graphische Aufbereitung |  |  |  |
| Reliabilität/Val. der Diagnose |  |  |  |
| Nutzen einzelner Interventionen |  |  |  |
| Wirksamkeit KVT oder einzelner Elemente |  |  |  |
| Prädiktoren Prognose (Lit.) |  |  |  |
| Zusätzl./ besonders ausführliche Hypothesen zur Funktionalität? |  |  |  |
| Selbsterfahrungsbericht |  |  |  |
| Vorschläge zur Therapieplanung |  |  |  |
| Auseinandersetzung - Diagnostik (z.B. Diskrepanzen zw. 2 Verf.) |  |  |  |
| Kritische Würdigung des Therapieprozesses |  |  |  |
| Quellen korrekt? |  |  |  |
| Anonymität |  |  |  |
| Runde Sache? |  |  |  |
| Seitenanzahl |  |  |  |
| Sonstiges |  | | |
|  |  | | |
| Notenvorschlag |  | | |
